# Supplementary material for: Discovery of Regulatory Elements is Improved by a Discriminatory Approach
Source: PubMed Central journal article supplement (PMC2770120; doi:10.1371/journal.pcbi.1000562), 2009-11-13
Supplement: pcbi.1000562.s020.pdf [file pcbi.1000562.s020.pdf]

| <b>Set</b>                | <b>Size</b> | <b>Negative set</b>               |
|---------------------------|-------------|-----------------------------------|
| ARE <i>Mus musculus</i>   | 14          | 1000 mouse promoters (-1000-+200) |
| ARE <i>Homo sapiens</i>   | 24          | 1000 human promoters (-1000-+200) |
| HNF4 <i>Mus musculus</i>  | 74          | 1000 mouse promoters (-1000-+200) |
| HNF4 <i>Homo sapiens</i>  | 84          | 1000 human promoters (-1000-+200) |
| RARE <i>Mus musculus</i>  | 76          | 1000 mouse promoters (-1000-+200) |
| HNF4 <i>Homo sapiens</i>  | 118         | 1000 human promoters (-1000-+200) |
| STAT1 <i>Homo sapiens</i> | 56          | 1000 human promoters (-1000-+200) |
